# Supplementary material for: The improved synthesis of carbonated soybean oil using supercritical carbon dioxide at a reduced reaction time
Source: Royal Society of Chemistry journal article supplement (doi:10.1039/b511014a), 2005-01-01
Supplement: b511014a.pdf [file b511014a.pdf]

Carbonated SBO 4.2: 09-28-05

Green Chemistry

5

### **Supporting Information**

#### **The Improved Synthesis of Carbonated Soybean Oil using Supercritical Carbon Dioxide at a Reduced Reaction Time.**

10 Kenneth M. Doll\* and Sevim Z. Erhan

Food and Industrial Oil Research Unit;  
National Center for Agricultural Utilization Research,  
United States Department of Agriculture, Agricultural Research Service,  
15 1815 N. University St., Peoria, IL 61604, USA

\*Corresponding author, mailing address: Food and Industrial Oil Unit, National Center  
for Agricultural Utilization Research, United States Department of Agriculture,  
20 Agricultural Research Service, 1815 N. University St., Peoria, Il 61604.

The use of trade, firm, or corporation names in this publication is for the information and  
convenience of the reader. Such use does not constitute an official endorsement or  
25 approval by the United States Department of Agriculture or the Agricultural Research  
Service of any product or service to the exclusion of others that may be suitable.

## Section S-1

### The NMR data for carbonated soybean oil.

NMR spectroscopy was performed on a Bruker Avance 500 NMR operating at  
5 500 MHz for  $^1\text{H}$  and 125 MHz for  $^{13}\text{C}$ . Bruker Icon NMR software was used running on  
an HP x1100 Pentium 4 workstation. Peaks were referenced to sodium 3-  
trimethylsilylpropionate-2,2,3,3- $\text{d}_4$  (TSP) at 0.0000 ppm. Simulations of  $^{13}\text{C}$  NMR  
spectra were performed by ACD/CNMR predictor version ACD/Labs 6.00, running on a  
Gateway Pentium 4 CPU with a 2.53 GHz processor

10

The carbonated soybean oil solution was dried in a Kugel-Rohr® and characterized by  
 $^1\text{H}$  NMR, and  $^{13}\text{C}$  NMR.  $^1\text{H}$  NMR:  $\delta$  5.3 ppm multiplet, ppm glycerol backbone single  
proton;  $\delta$  4.49–4.90 ppm, multiple signals, cyclic carbonate ring protons;  $\delta$  4.11-4.29  
ppm, multiplet, glycerol backbone, 4 proton signal;  $\delta$  2.32 ppm, triplet, protons on carbon  
15  $\alpha$  to backbone, 2 proton signal;  $\delta$  0.86 ppm triplet, end of fatty chain, 3 proton signal;  
other signals from  $\delta$  1.2-2.2 ppm, many signals.  $^{13}\text{C}$  NMR:  $\delta$  173 and  $\delta$  172, glycerol  
backbone carbonyl carbons;  $\delta$  153 and  $\delta$  154, cyclic carbonate carbons from both oleic  
and linoleic moieties;  $\delta$  79-82 ppm, cyclic ring carbons;  $\delta$  69 and  $\delta$  62, glycerol backbone  
signals;  $\delta$  20-35 multiple signals.

The reaction products of different reaction times were studied by  $^1\text{H}$  NMR and  $^{13}\text{C}$  NMR. Both the  $^1\text{H}$  and  $^{13}\text{C}$  NMR show the conversion to the expected product. The carbonated product has new peaks in the  $^1\text{H}$  NMR at  $\delta$  4.49–4.9 ppm corresponding to the protons on the carbons in the cyclic carbonate rings. Additionally the disappearance of the protons in the  $\delta$  2.89–3.13 ppm region can be followed and used to help quantitate the reaction progress at each reaction time (Table 1). The size of these peaks was compared to the signal at  $\delta$  0.86 ppm, a triplet corresponding to the end of the fatty chains which did not change position with reaction progress. It can be seen that the reaction is ~94% complete in only 20 hours, less than 1/3 of the reaction time required to achieve the same extent of completion in the literature synthesis.<sup>1</sup> Another  $^1\text{H}$  NMR signal of note is the shift of the peak at  $\delta$  1.49 ppm slightly downfield to  $\delta$  1.61 ppm but it was not resolved sufficiently to attempt quantitation. In the  $^{13}\text{C}$  NMR, the appearance of the carbonyl signals of the cyclic moieties at  $\delta$  153 and 154 ppm are clearly visible. Additionally, the corresponding signals in of the epoxy carbons of the starting material at  $\delta$  58–62 ppm are not present.

## Section S-2

### A Plot to obtain the apparent 1<sup>st</sup> order kinetic rate constant

Using the <sup>1</sup>H NMR spectroscopy data, A plot of the  $\ln ([\text{ESO}]_{\text{initial}}/[\text{ESO}]_t)$  vs time was  
5 performed for our system and from the literature synthesis.<sup>1</sup>

A 1<sup>st</sup> order kinetic rate constant of 0.1118 hr<sup>-1</sup> was calculated in our system,  
giving a  $t_{1/2}$  of 6.2 hrs. From literature data, a rate of ~0.0402 hr<sup>-1</sup> and  $t_{1/2}$  of 17.2 hrs can  
be calculated in a similar manner. In other words, we have increased the observed  
reaction rate by a factor of three.

10

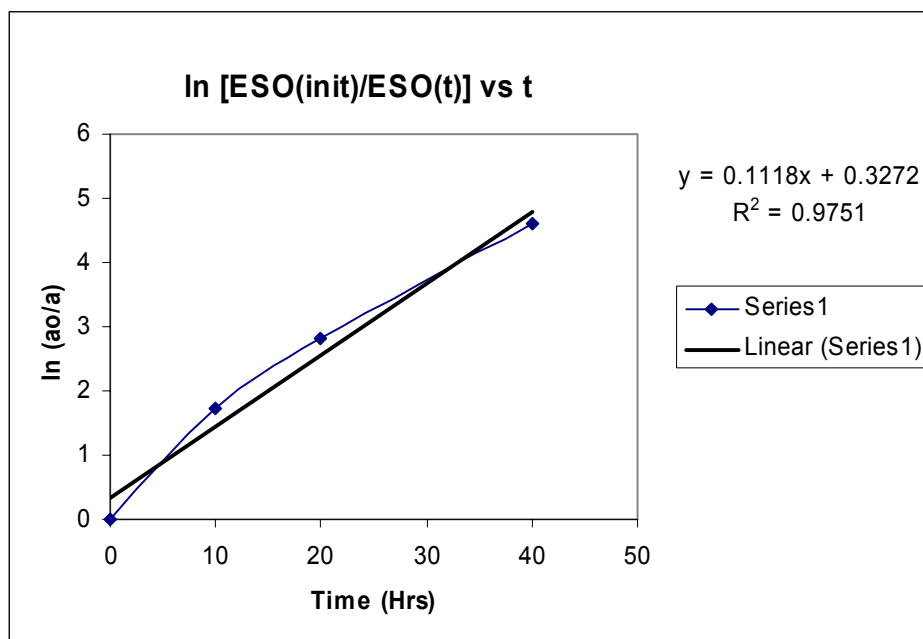

## References

- 15 1 B. Tamami, S. Sohn, G. L. Wilkes, and B. Tamami, *J. Appl. Polym. Sci.*, 2004,  
92, 883.
